# Supplementary material
Source: Springer Nature journal article supplement (https://www.springermedizin.de/resource/supplementary/12889_2011_3883_MOESM1_ESM.pdf/9490916)
Supplement: MOESM1 [file 9490916]

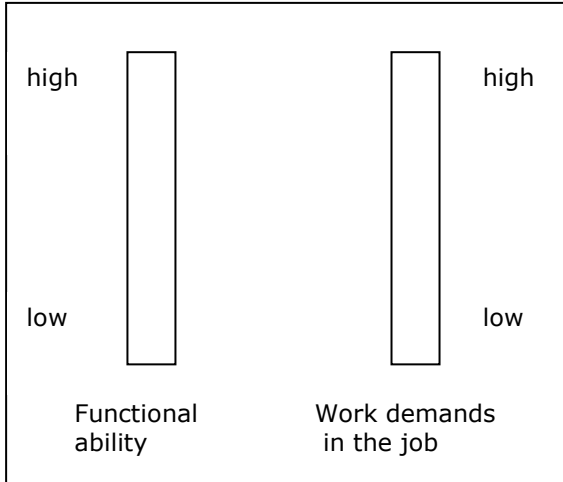

Figure 1.a: the basic model

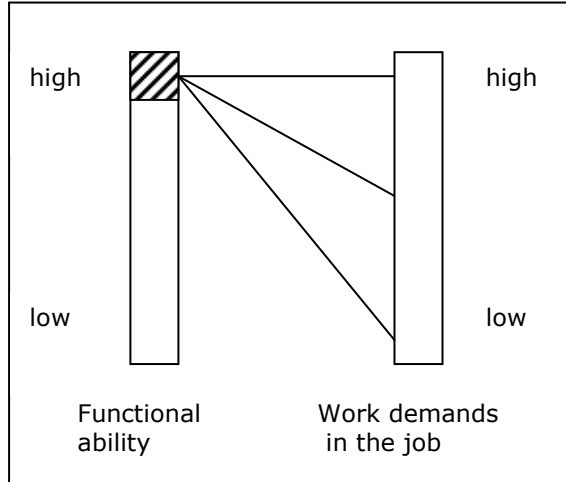

Figure 1.b: the jobs accessible for claimants high in functional ability

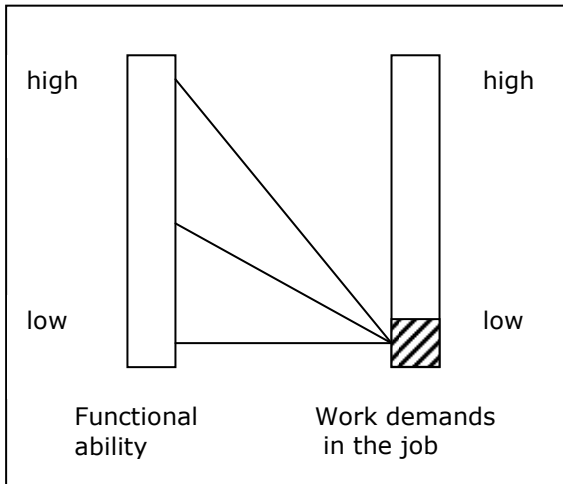

Figure 1.c: the types of claimants able to work in jobs low in work demands

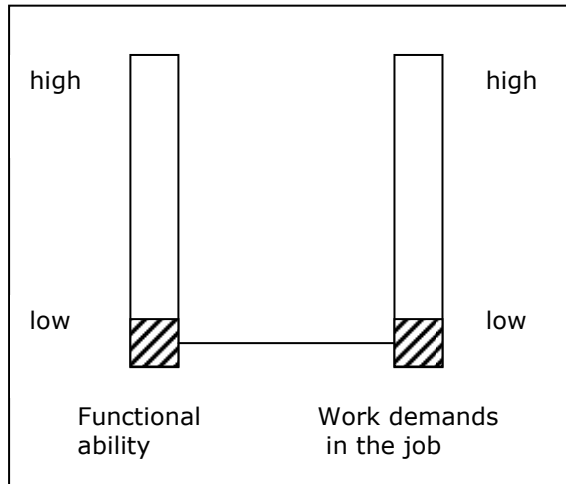

Figure 1.d: the jobs accessible for claimants low in functional ability (severely disabled)
